# Supplementary material for: Phonembewusstheit nach schriftsprachlichem Input
Source: Atypon-hosted journal article supplement (doi:10.1026/0012-1924/a000272), 2021-06-25
Supplement: 0012-1924_a000272_esm1.pdf [file 0012-1924_a000272_esm1.pdf]

## ESM 1 – abgewandelte Beispielitems

### Operation: Phoneme segmentieren

Schreiben Sie bitte zu dem folgenden Wort den Laut der angegebenen Position auf.

Beispiel: 3. Laut in ⟨Mut⟩: /t/

3. Laut in ⟨lebt⟩:        /p/    (Hinweis zum Distraktor: Wenn sich die Proband\*innen statt auf die Laute ([le:pt]) auf die Buchstaben konzentrieren, ist es wahrscheinlich, dass sie /b/ statt /p/ angeben.)

### Operation: Phoneme manipulieren

1. Sprechen Sie das folgende Pseudowort leise aus.
2. Sprechen Sie nun die Lautreihe des Pseudowortes rückwärts (von hinten nach vorne) leise aus und nennen Sie das daraus neu entstandene deutsche Realwort.
3. Schreiben Sie im dritten Schritt das neue Wort in seiner orthographisch korrekten Schreibweise neben das bereitgestellte Wort auf. Bitte achten Sie auch auf die Groß- und Kleinschreibung.

Beispiel: Das Wort ⟨Tusch⟩ wird zu ⟨Schutt⟩.

⟨liets⟩ wird zu *Ziel* (Hinweis zu den Distraktoren: Wenn sich die Proband\*innen statt auf die Laute des vorgegebenen Wortes ([li:ts̃]) auf die Buchstaben konzentrieren, ist es wahrscheinlich, dass sie ⟨Stiel⟩, ⟨Stil⟩ oder ⟨steil⟩ schreiben.)
