# Supplementary material for: Phonembewusstheit nach schriftsprachlichem Input
Source: Atypon-hosted journal article supplement (doi:10.1026/0012-1924/a000272), 2021-06-25
Supplement: 0012-1924_a000272_esm2.pdf [file 0012-1924_a000272_esm2.pdf]

**Tabelle E1.** Itemparameter aus einem eindimensionalen 2PL-Modell mit sämtlichen 36 Items (geschätzt in ConQuest)

| Item      | $\alpha_i$ | $\delta_i$ | $N_i$  | $h_i$   | Item | $\alpha_i$ | $\delta_i$ | $N_i$ | $h_i$   |        |         |     |     |
|-----------|------------|------------|--------|---------|------|------------|------------|-------|---------|--------|---------|-----|-----|
| <b>1</b>  | 0.711      | (0.175)    | -0.720 | (0.148) | 261  | .66        | 19         | 2.627 | (0.652) | 4.870  | (0.892) | 266 | .07 |
| 2         | 1.182      | (0.216)    | -0.214 | (0.159) | 265  | .54        | 20         | 1.200 | (0.244) | 1.998  | (0.241) | 262 | .17 |
| <b>3</b>  | 0.474      | (0.159)    | -0.758 | (0.140) | 263  | .67        | 21         | 3.196 | (0.771) | 5.285  | (1.027) | 264 | .08 |
| 4         | 1.028      | (0.211)    | -0.819 | (0.166) | 262  | .66        | 22         | 1.524 | (0.296) | 2.062  | (0.284) | 238 | .20 |
| <b>5</b>  | 0.730      | (0.184)    | 1.463  | (0.176) | 269  | .21        | 23         | 0.846 | (0.271) | -2.481 | (0.270) | 266 | .90 |
| 6         | 1.187      | (0.216)    | -0.074 | (0.158) | 267  | .51        | <b>24</b>  | 0.082 | (0.255) | -2.507 | (0.233) | 265 | .92 |
| <b>7</b>  | 0.306      | (0.154)    | 1.073  | (0.143) | 270  | .26        | <b>25</b>  | 0.350 | (0.144) | -0.356 | (0.128) | 266 | .59 |
| 8         | 0.922      | (0.186)    | 0.334  | (0.147) | 270  | .43        | 26         | 1.039 | (0.204) | -0.627 | (0.159) | 265 | .63 |
| 9         | 1.493      | (0.270)    | -0.920 | (0.194) | 269  | .66        | 27         | 1.063 | (0.203) | 0.530  | (0.159) | 261 | .39 |
| <b>10</b> | 0.143      | (0.157)    | 1.228  | (0.147) | 268  | .23        | <b>28</b>  | 0.283 | (0.157) | 1.008  | (0.144) | 260 | .27 |
| 11        | 1.245      | (0.234)    | -0.884 | (0.178) | 270  | .66        | 29         | 1.027 | (0.206) | 0.606  | (0.159) | 261 | .38 |
| <b>12</b> | 0.769      | (0.173)    | 0.551  | (0.144) | 271  | .38        | <b>30</b>  | 0.303 | (0.162) | 1.213  | (0.152) | 259 | .24 |
| 13        | 1.360      | (0.282)    | -1.957 | (0.253) | 271  | .82        | <b>31</b>  | 0.017 | (0.138) | 0.311  | (0.126) | 260 | .42 |
| <b>14</b> | 0.579      | (0.257)    | -2.378 | (0.240) | 265  | .91        | <b>32</b>  | 0.688 | (0.174) | 0.353  | (0.143) | 250 | .43 |
| 15        | 0.873      | (0.183)    | 0.657  | (0.153) | 260  | .37        | 33         | 1.018 | (0.216) | 1.481  | (0.199) | 253 | .23 |
| 16        | 1.126      | (0.222)    | 1.490  | (0.199) | 266  | .23        | 34         | 1.582 | (0.290) | -0.464 | (0.187) | 253 | .59 |
| 17        | 0.916      | (0.214)    | 1.861  | (0.212) | 266  | .17        | 35         | 0.978 | (0.201) | 0.947  | (0.171) | 253 | .32 |
| <b>18</b> | 0.765      | (0.241)    | 2.558  | (0.269) | 265  | .09        | 36         | 0.800 | (0.187) | 0.843  | (0.161) | 245 | .33 |

*Anmerkungen:*  $N = 271$ ; Itemdiskrimination  $\alpha_i$ , Itemschwierigkeit  $\delta_i$ , Anzahl valider Antworten  $N_i$ , relative Lösungshäufigkeit  $h_i$ , Standardfehler jeweils in Klammern; Aufgrund geringer Itemdiskrimination ( $\alpha < 0.8$ ) in nachfolgenden Analysen ausgeschlossene Itemnummern sind fett gedruckt.
